# Supplementary material for: Thorough studies of tricyanomethanide-based ionic liquids – the influence of alkyl chain length of the cation
Source: Royal Society of Chemistry journal article supplement (doi:10.1039/d0sm01433h), 2020-01-01
Supplement: d0sm01433h1.pdf [file d0sm01433h1.pdf]

## SUPPORTING INFORMATION

### Thorough studies of tricyanomethanide-based ionic liquids - the influence of alkyl chain length in the cation

M. Musiał\*, S. Cheng, Z. Wojnarowska, B. Yao, K. Jurkiewicz, M. Paluch

*Institute of Physics, University of Silesia in Katowice, Silesian Center for Education and Interdisciplinary Research, 75 Pułku Piechoty 1A, 41–500 Chorzów, Poland*

Corresponding author: [malgorzata.musial@smcebi.edu.pl](mailto:malgorzata.musial@smcebi.edu.pl)

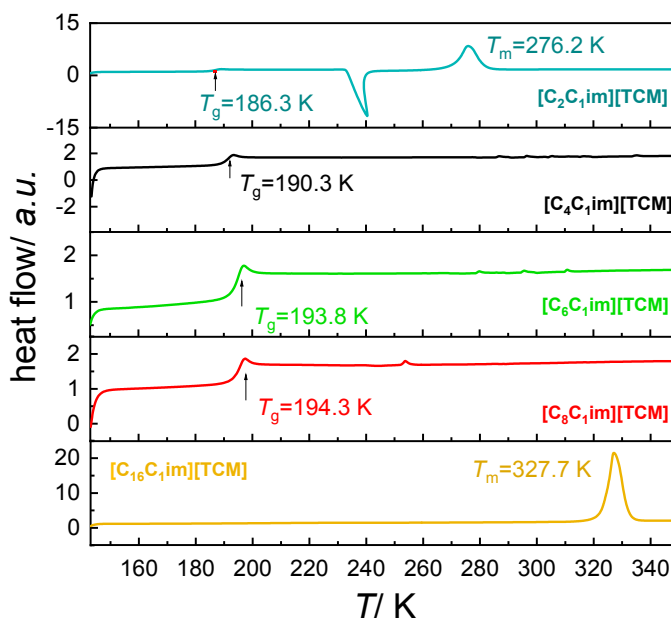

**Fig. S1** Calorimetric experiments of [C<sub>n</sub>C<sub>1</sub>im][NTf<sub>2</sub>] series (n=2,4,6,8,16) were performed from 143 to 350 K at a heating rate 10 K·min<sup>-1</sup>.

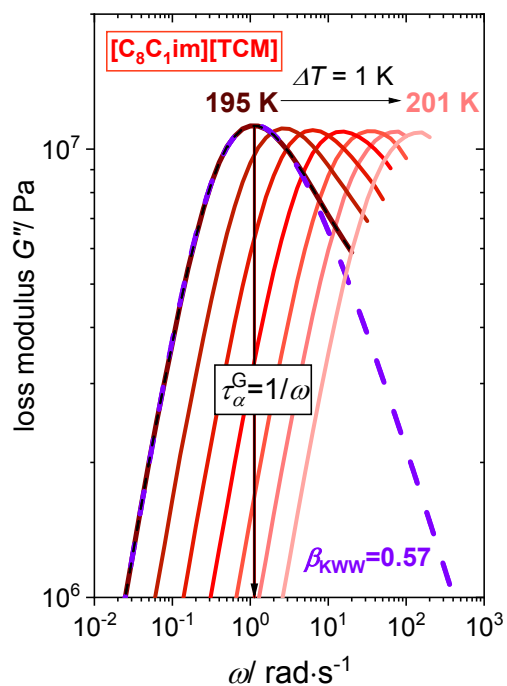

**Fig. S2** Representative loss modulus  $G''$  spectra of  $[C_8C_1im][TCM]$  recorded in the temperature range 195 – 201 K.

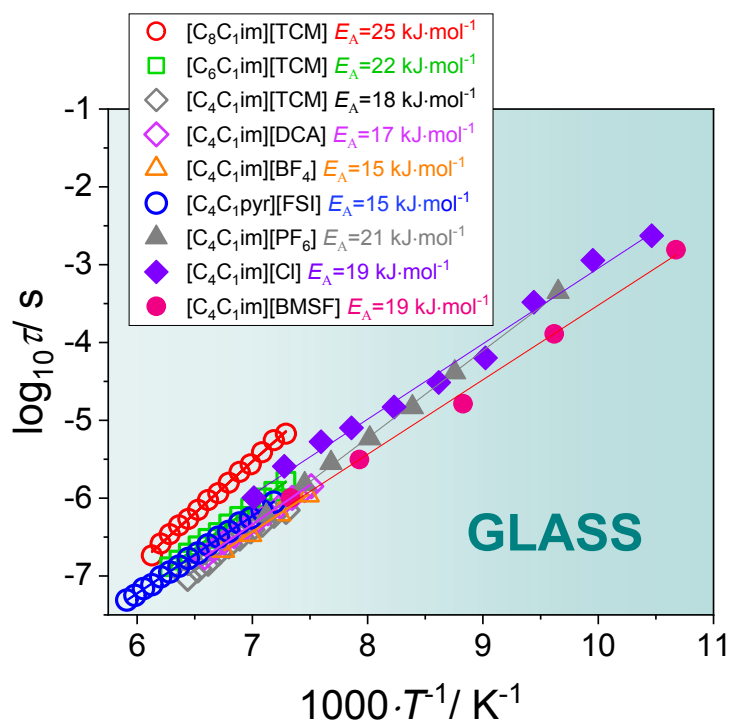

**Fig. S3** The relaxation times below  $T_g$  for  $[TCM]$ -based ILs,  $[C_4C_1im][DCA]$  (this work),  $[C_4C_1im][BF_4]$  (this work),  $[C_4C_1pyr][FSI]$  (this work),  $[C_4C_1im][PF_6]$ <sup>1</sup>,  $[C_4C_1im][BMSF]$ <sup>1</sup>,  $[C_4C_1im][Cl]$ <sup>1</sup>. Solid lines are the Arrhenius  $T$ -dependence.

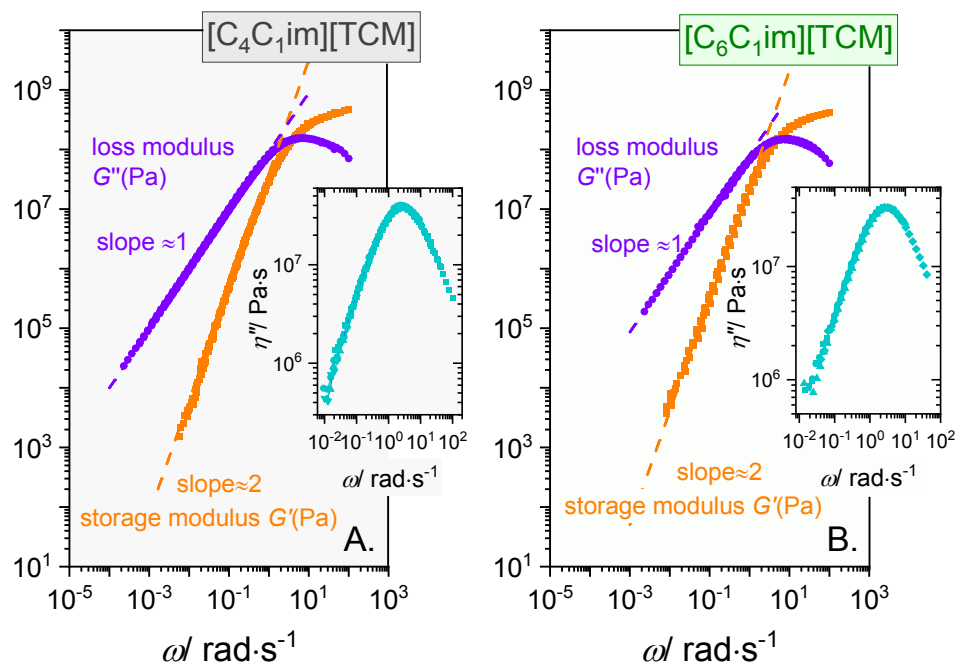

**Fig. S4** Real  $G'$  and imaginary  $G''$  parts of the complex shear modulus,  $G^*$ , of **A.**  $[C_4C_1im][TCM]$  and **B.**  $[C_6C_1im][TCM]$  plotted as mastercurve. Insets present imaginary part of the complex viscosity plotted as mastercurve.

### Reference

<sup>1</sup> A. Rivera and E.A. Rössler, *Phys. Rev. B*, 2006, **73**, 212201.
